# Supplementary material
Source: Springer Nature journal article supplement (https://www.springermedizin.de/resource/supplementary/13023_2008_136_MOESM6_ESM.pdf/9641750)
Supplement: MOESM6 [file 9641750]

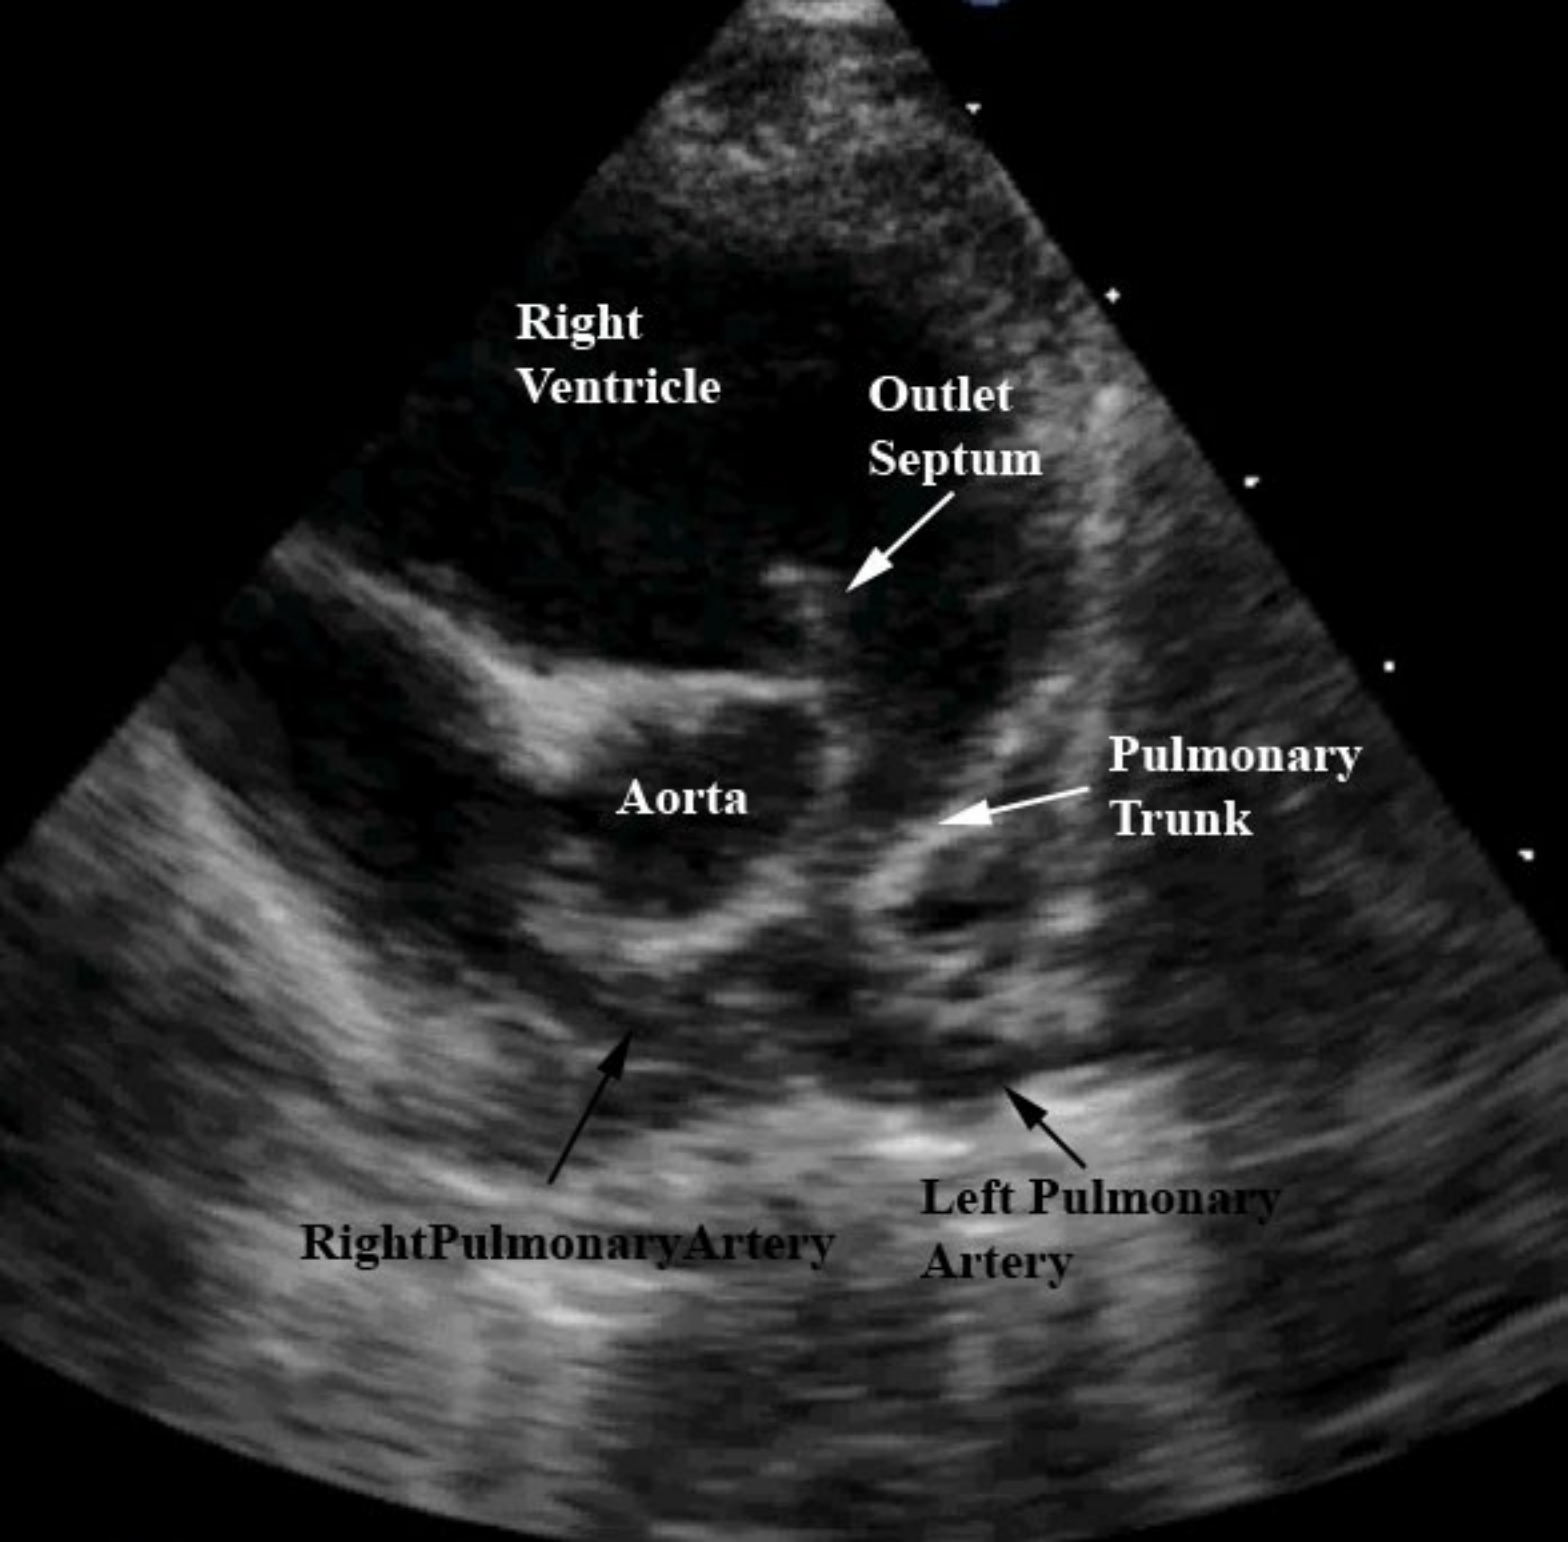

**Right  
Ventricle**

**Outlet  
Septum**

**Aorta**

**Pulmonary  
Trunk**

**Right Pulmonary Artery**

**Left Pulmonary  
Artery**
